# Supplementary material for: A stand-alone tree demography and landscape structure module for Earth system models: integration with inventory data from temperate and boreal forests
Source: Copernicus journal article supplement (doi:10.5194/bg-11-4039-2014), 2014-08-01
Supplement: Supplementary file 1 [file bg-11-4039-2014-supplement.zip]

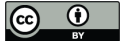

## *Supplement of*

# **A stand-alone tree demography and landscape structure module for Earth system models: integration with inventory data from temperate and boreal forests**

**V. Haverd et al.**

*Correspondence to:* V. Haverd ([vanessa.haverd@csiro.au](mailto:vanessa.haverd@csiro.au))

- Supplement-Cover-Letter.pdf
- POP.F90
- POP\_driver.F90
